# Supplementary material for: Monodispersed nickel phosphide nanocrystals with different phases: synthesis, characterization and electrocatalytic properties for hydrogen evolution
Source: Royal Society of Chemistry journal article supplement (doi:10.1039/c4ta04867a), 2014-11-04
Supplement: c4ta04867a1.pdf [file c4ta04867a1.pdf]

**Monodispersed nickel phosphide nanocrystals with different  
phases: synthesis, characterization and electrocatalytic  
properties for hydrogen evolution**

*Yuan Pan, Yanru Liu, Jinchong Zhao, Kang Yang, Jilei Liang, Dandan Liu, Wenhui Hu, Dapeng Liu,*

*Yunqi Liu\*, Chenguang Liu*

*State Key Laboratory of Heavy Oil Processing, Key Laboratory of Catalysis, China National*

*Petroleum Corporation (CNPC), China University of Petroleum, 66 West Changjiang Road, Qingdao,*

*Shandong 266580, P. R. China*

---

\* Corresponding author. E-mail address: [liyq@upc.edu.cn](mailto:liyq@upc.edu.cn).

Tel.: +86-532-86981861.

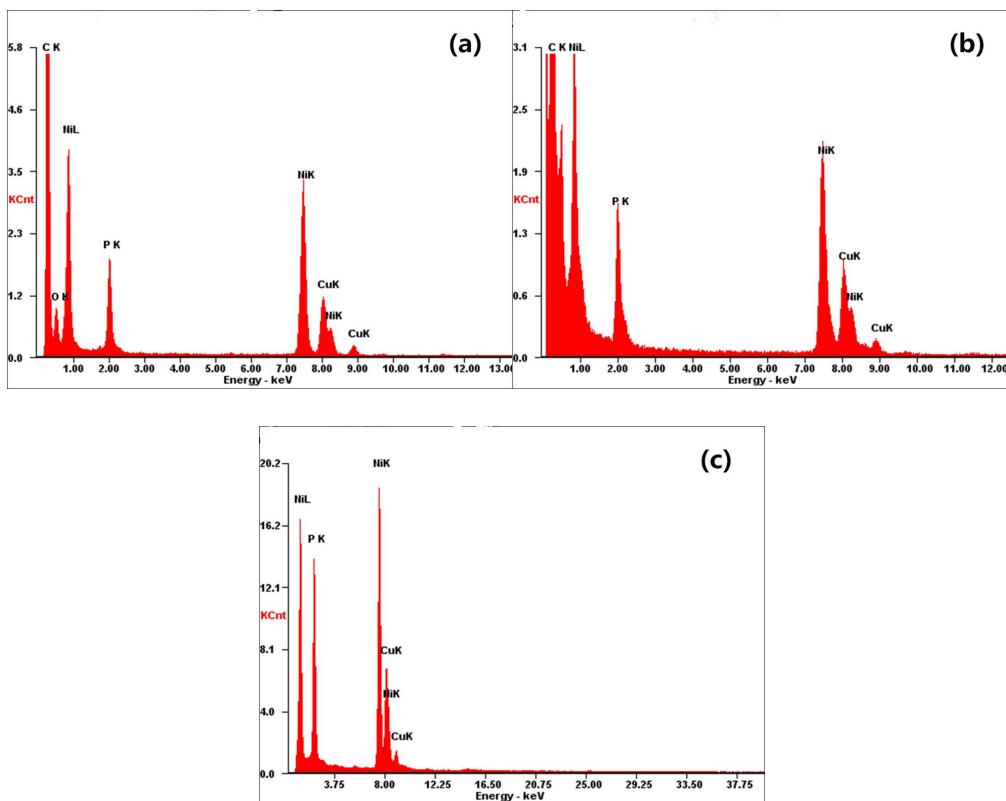

**Fig. S1** EDX spectra of nickel phosphide NCs with different phases (a)  $\text{Ni}_{12}\text{P}_5$ , (b)  $\text{Ni}_2\text{P}$  and (c)  $\text{Ni}_5\text{P}_4$  NCs.

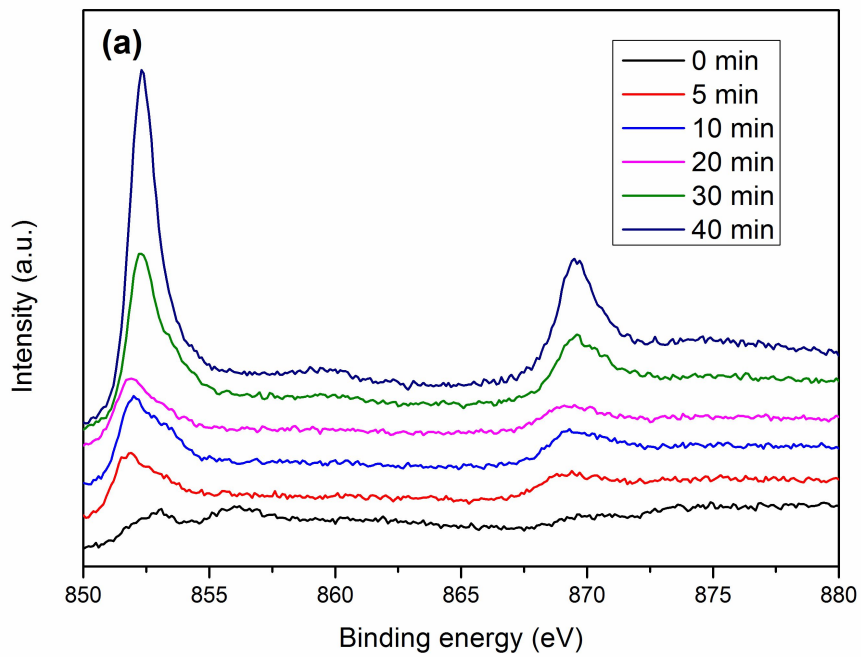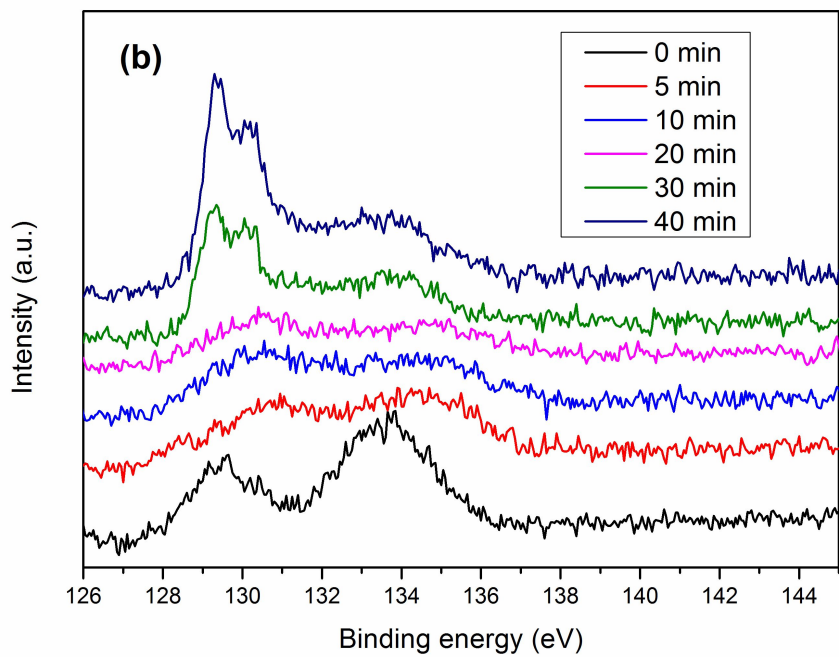

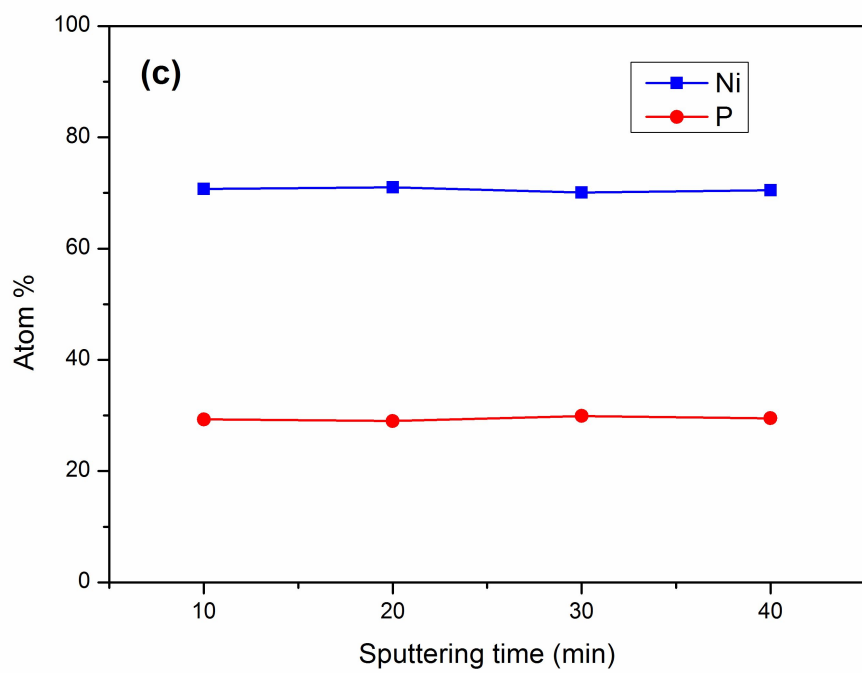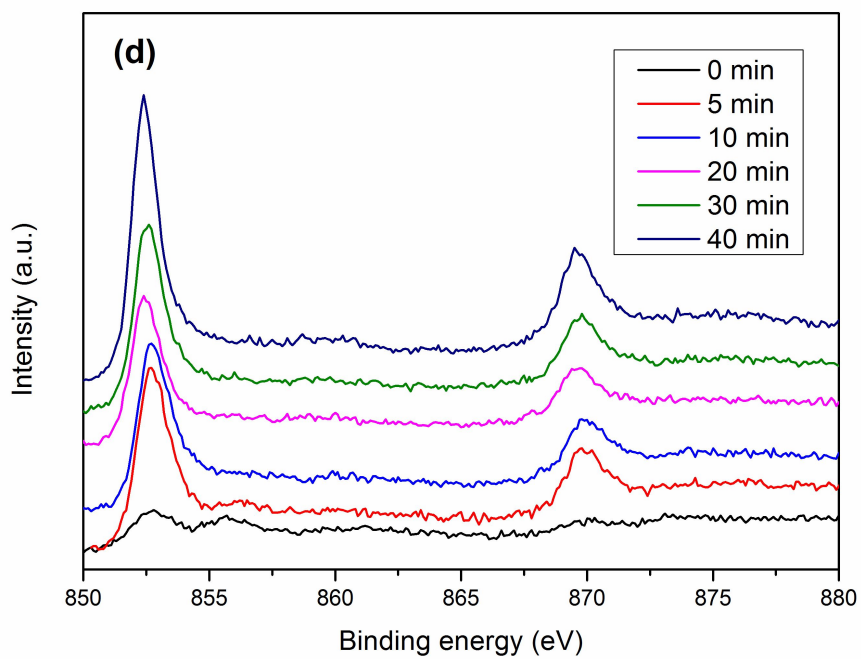

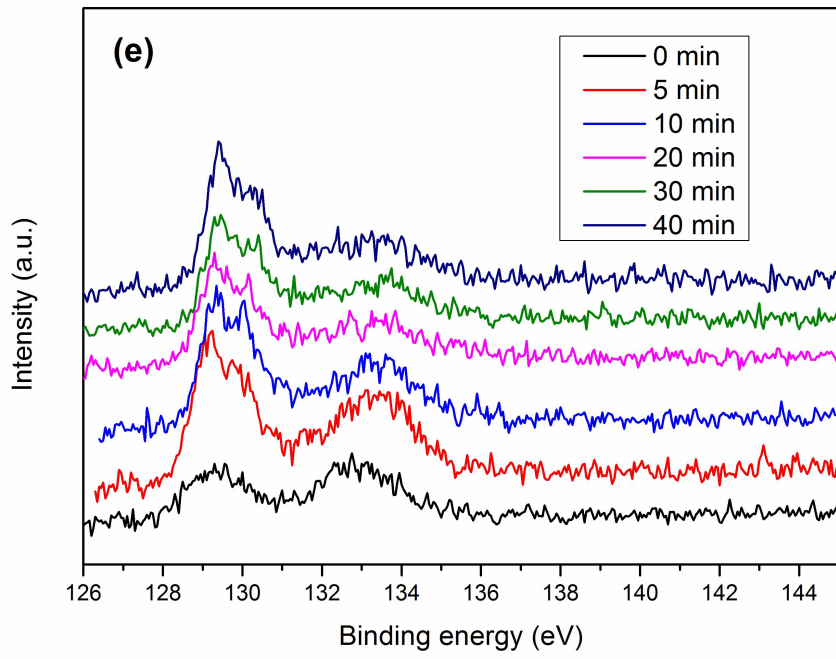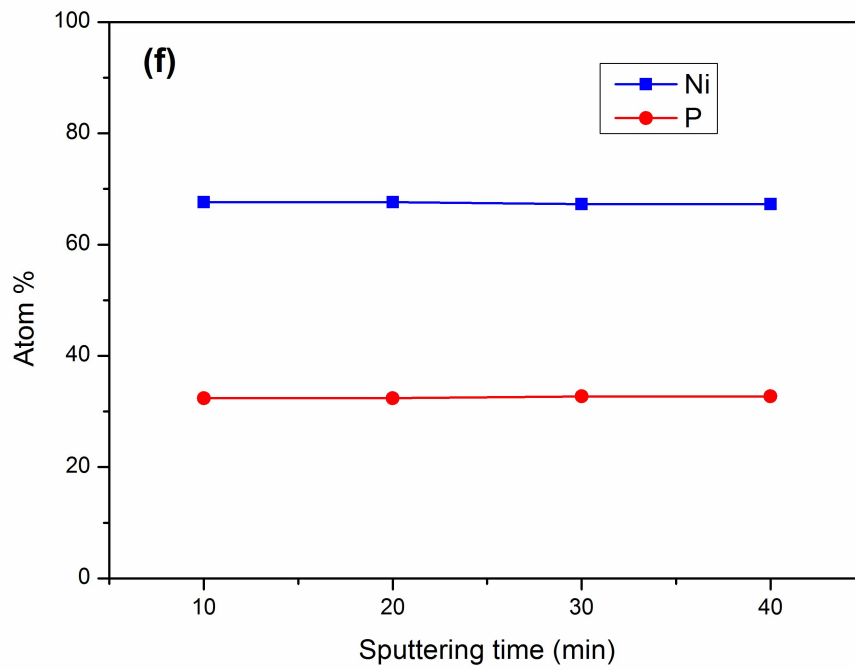

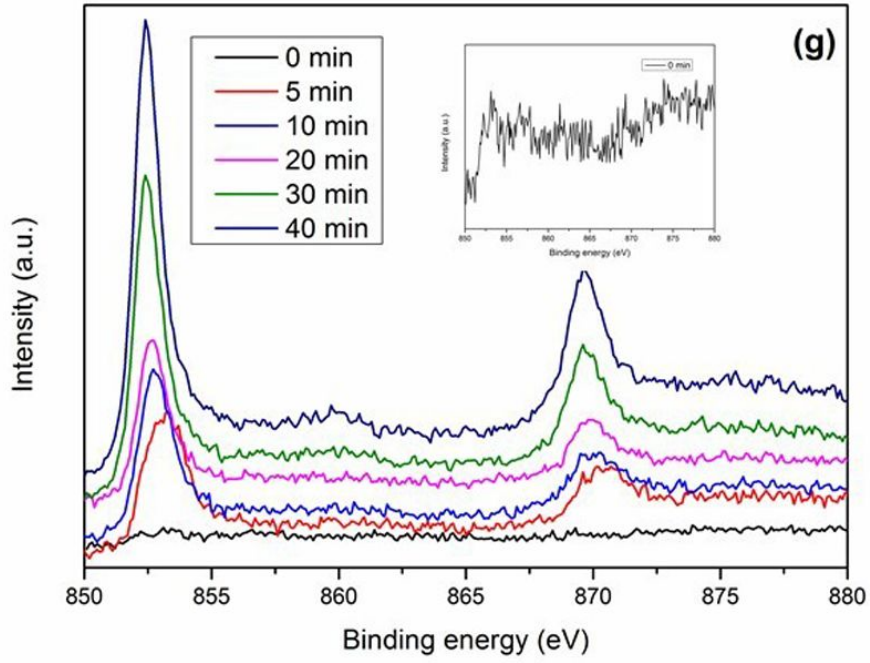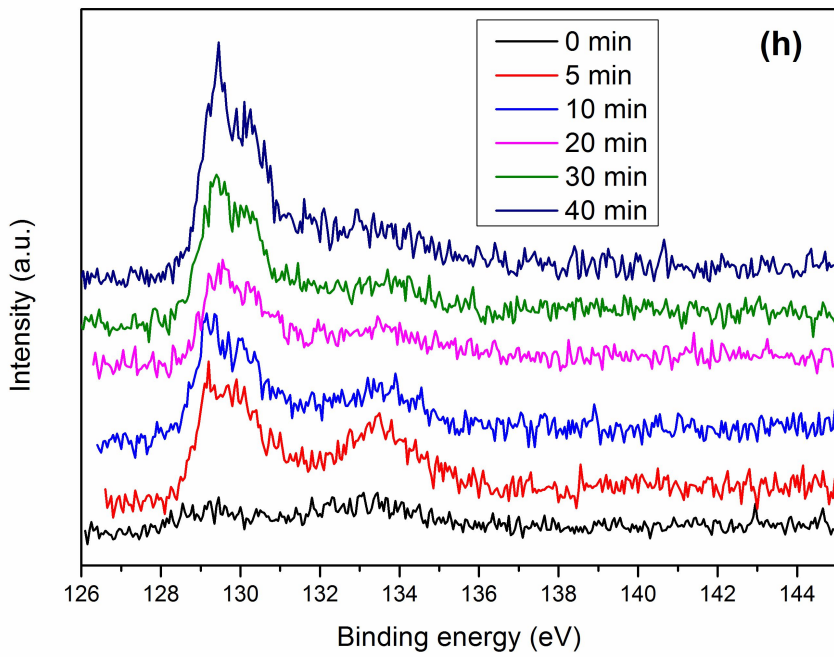

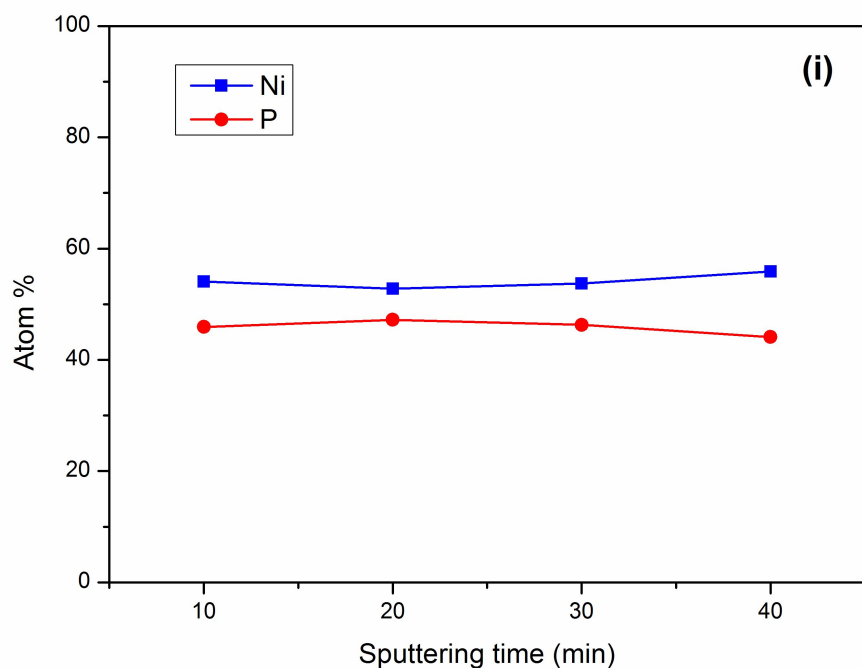

Fig. S2 XPS spectra in the (a) Ni(2p) and (b) P(2p) regions for Ni<sub>12</sub>P<sub>5</sub> NCs, (d) Ni(2p) and (e) P(2p) regions for Ni<sub>2</sub>P NCs, (g) Ni(2p) and (h) P(2p) regions for Ni<sub>5</sub>P<sub>4</sub> NCs after 0, 5, 10, 20, 30 and 40 min Ar<sup>+</sup> etching. Inserted in (g) is an expansion Ni(2p) region for Ni<sub>5</sub>P<sub>4</sub> NCs after 0 min Ar<sup>+</sup> etching. The peaks for oxidized Ni and P species decrease while the peaks for Ni<sub>12</sub>P<sub>5</sub>, Ni<sub>2</sub>P and Ni<sub>5</sub>P<sub>4</sub> increase after 5 min Ar<sup>+</sup> etching. The oxidized Ni and P species nearly completely removed after 10 min Ar<sup>+</sup> etching. (c), (f) and (i) are the corresponding XPS depth profiles of Ni and P elements for the Ni<sub>12</sub>P<sub>5</sub>, Ni<sub>2</sub>P and Ni<sub>5</sub>P<sub>4</sub> NCs, respectively.

**Table S1** Comparison of HER activity of some transition metal phosphides.

| Catalyst                                   | Current density<br>(mA·cm <sup>-2</sup> ) | Potential<br>(mV) | Electrolyte                          | Tafel slope<br>(mV·dec <sup>-1</sup> ) | Reference |
|--------------------------------------------|-------------------------------------------|-------------------|--------------------------------------|----------------------------------------|-----------|
| Ni <sub>12</sub> P <sub>5</sub> hollow NPs | 10                                        | 208               | 0.5 M H <sub>2</sub> SO <sub>4</sub> | 75                                     | This work |
| Ni <sub>2</sub> P hollow NPs               | 10                                        | 137               | 0.5 M H <sub>2</sub> SO <sub>4</sub> | 49                                     | This work |
| Ni <sub>5</sub> P <sub>4</sub> solid NPs   | 10                                        | 118               | 0.5 M H <sub>2</sub> SO <sub>4</sub> | 42                                     | This work |
| CoP NWs                                    | 10                                        | 110               | 0.5 M H <sub>2</sub> SO <sub>4</sub> | 54                                     | 22        |
| CoP NSs                                    | 10                                        | 164               | 0.5 M H <sub>2</sub> SO <sub>4</sub> | 61                                     | 22        |
| CoP NPs                                    | 44410                                     | 221               | 0.5 M H <sub>2</sub> SO <sub>4</sub> | 87                                     | 22        |
| Amorphous MoP                              | 10                                        | 90                | 0.5 M H <sub>2</sub> SO <sub>4</sub> | 45                                     | 23        |
| Bulk CoP                                   | 30                                        | 180               | 0.5 M H <sub>2</sub> SO <sub>4</sub> | 54                                     | 13        |
| FeP NSs                                    | 10                                        | 240               | 0.5 M H <sub>2</sub> SO <sub>4</sub> | 67                                     | 24        |
| Ni <sub>2</sub> P hollow NPs               | 10                                        | 116               | 0.5 M H <sub>2</sub> SO <sub>4</sub> | 46                                     | 14        |
| Ni <sub>2</sub> P NPs                      | 20                                        | 140               | 1 M H <sub>2</sub> SO <sub>4</sub>   | 87                                     | 25        |
| Ni <sub>12</sub> P <sub>5</sub> NPs        | 20                                        | 141               | 0.5 M H <sub>2</sub> SO <sub>4</sub> | 63                                     | 15        |
| Ni <sub>2</sub> P/Ti                       | 20                                        | 138               | 1 M H <sub>2</sub> SO <sub>4</sub>   | 60                                     | 44        |
| NiP <sub>2</sub> NS/CC                     | 20                                        | 99                | 0.5 M H <sub>2</sub> SO <sub>4</sub> | 51                                     | 45        |
| CoP/CNT                                    | 10                                        | 122               | 0.5 M H <sub>2</sub> SO <sub>4</sub> | 54                                     | 41d       |
| MoP-CA2 NPs                                | 10                                        | 125               | 0.5 M H <sub>2</sub> SO <sub>4</sub> | 54                                     | 42b       |
| CoP NPs/CC                                 | 10                                        | 48                | 0.5 M H <sub>2</sub> SO <sub>4</sub> | 70                                     | 49        |
| CoP/Ti                                     | 10                                        | 90                | 0.5 M H <sub>2</sub> SO <sub>4</sub> | 43                                     | 41c       |
| MoP/CF                                     | 100                                       | 200               | 0.5 M H <sub>2</sub> SO <sub>4</sub> | 67.4                                   | 42a       |



|                         |    |     |                                      |     |     |
|-------------------------|----|-----|--------------------------------------|-----|-----|
| Cu <sub>3</sub> P NW/CF | 10 | 143 | 0.5 M H <sub>2</sub> SO <sub>4</sub> | 67  | 43  |
|                         | 20 | 100 | 0.5 M H <sub>2</sub> SO <sub>4</sub> | 51  |     |
| CoP/CC                  | 2  | 65  | 1M PBS                               | 93  | 41b |
|                         | 10 | 209 | 1M KOH                               | 129 |     |
| CoP NTs                 | 10 | 129 | 0.5 M H <sub>2</sub> SO <sub>4</sub> | 60  | 41a |
| np-CoP NWs/Ti           | 20 | 95  | 0.5 M H <sub>2</sub> SO <sub>4</sub> | 65  | 50  |
| FeP NA/Ti               | 20 | 72  | 0.5 M H <sub>2</sub> SO <sub>4</sub> | 38  | 46  |

---

**Table S2** Calculations of the exchange current densities of Ni<sub>12</sub>P<sub>5</sub>, Ni<sub>2</sub>P and Ni<sub>5</sub>P<sub>4</sub>

NCs by using extrapolation methods.

| Catalyst                        | $\log( j \text{ (mA}\cdot\text{cm}^{-2}) )$ at $\eta=0$ V | Exchange current densities $j_0$ [ $\mu\text{A}\cdot\text{cm}^{-2}$ ] |
|---------------------------------|-----------------------------------------------------------|-----------------------------------------------------------------------|
| Ni <sub>12</sub> P <sub>5</sub> | -1.544                                                    | 28.57                                                                 |
| Ni <sub>2</sub> P               | -1.338                                                    | 45.92                                                                 |
| Ni <sub>5</sub> P <sub>4</sub>  | -1.244                                                    | 57.02                                                                 |
